# Supplementary material for: Machine learning techniques in disease forecasting: a case study on rice blast prediction
Source: Springer Nature journal article supplement (doi:10.1186/1471-2105-7-485), 2006-11-03

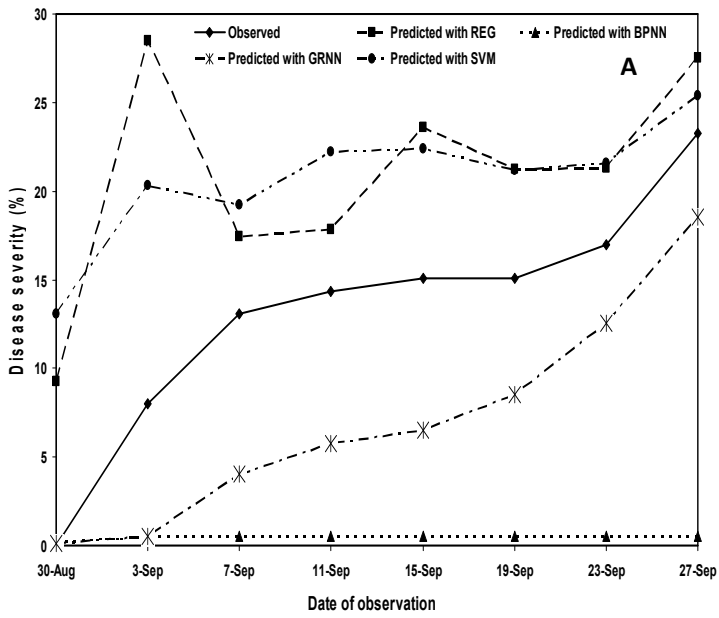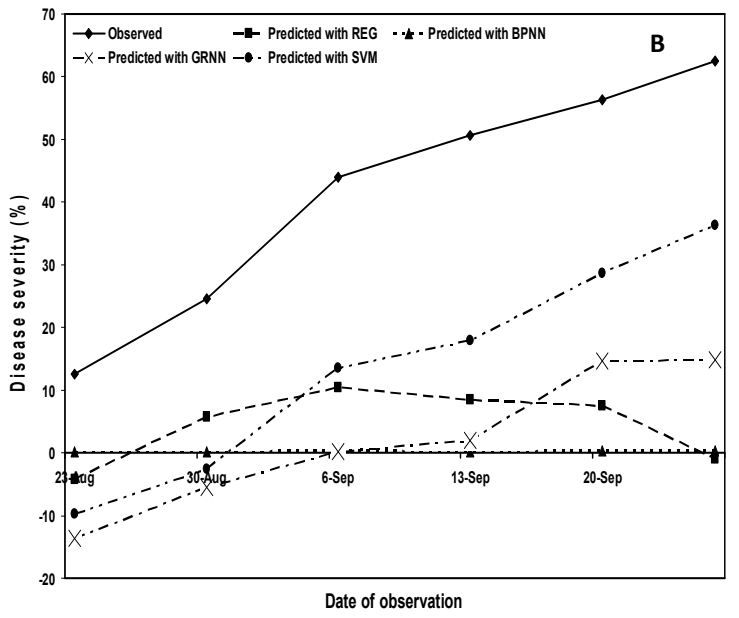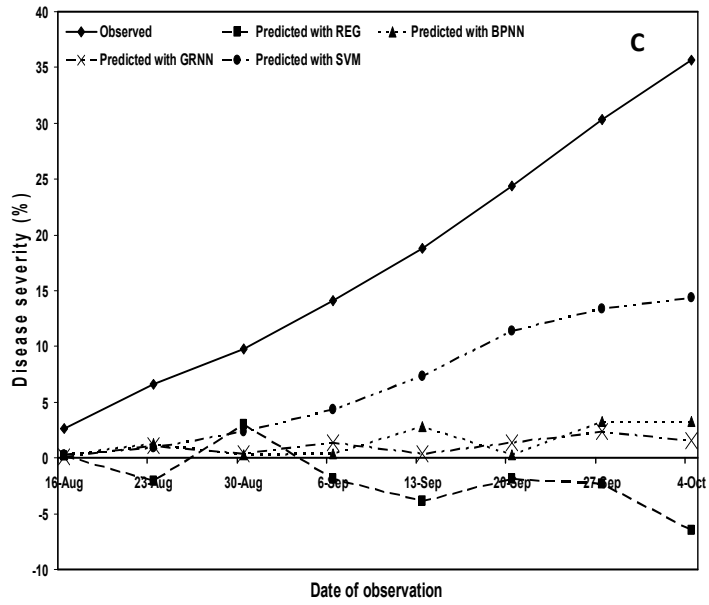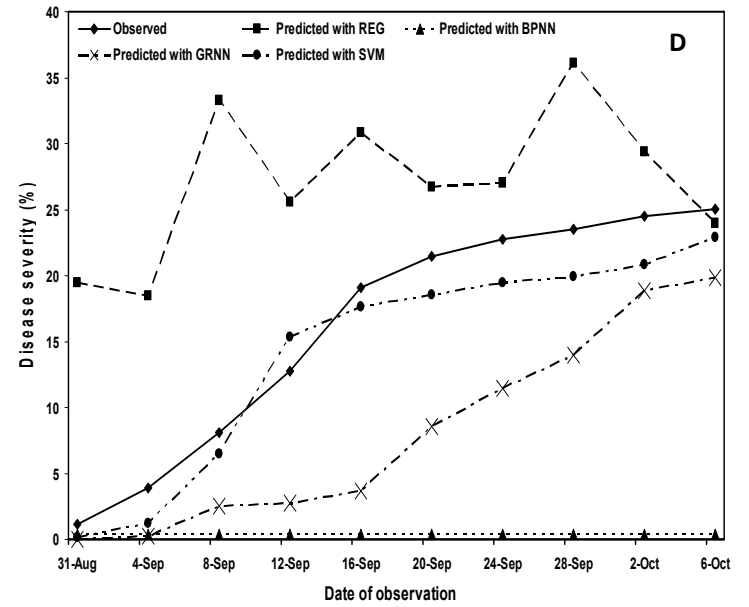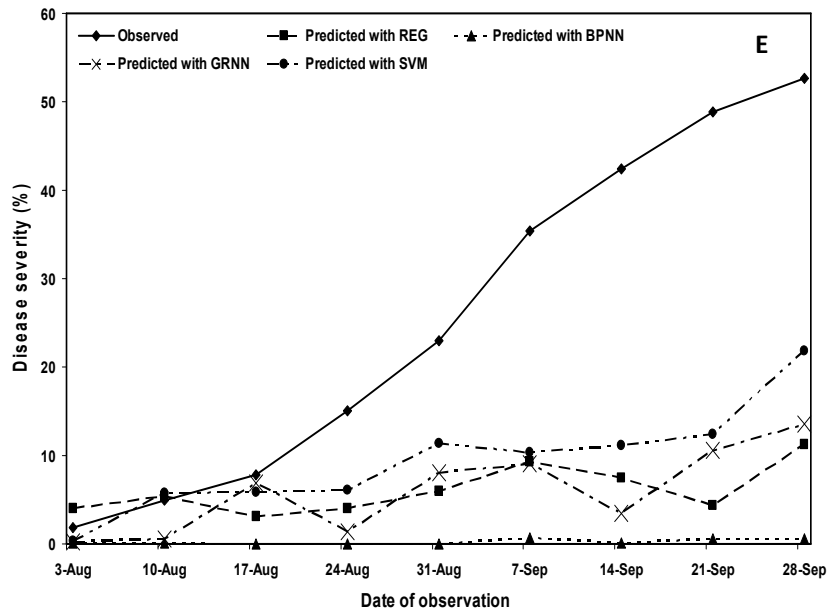

Supplement: 12859_2006_1224_MOESM2_ESM.pdf [file 12859_2006_1224_MOESM2_ESM.pdf]
